note: This short paper is a work we got rejected several years ago, and we had no time/will to resubmit. We still think it has some interest (referee's comments are incorporated) and is citable if you use the DOI, so we've decided to make it public and free for your use.

Comparison of biochemical, histological and morphological response of muscle-based condition indices to varying food levels in pre-flexion *Dicentrarchus labrax* (L.) larvae

Ignacio A. Catalán<sup>1,a</sup>, M. Pilar Olivar<sup>2</sup> and Elisa Berdalet<sup>2</sup>

<sup>1</sup>Instituto Mediterráneo de Estudios Avanzados (IMEDEA, UIB-CSIC), 21 Miguel Marques, CP 07190, Esporles, Illes Balears, Spain

<sup>2</sup>Instituto de Ciencias del Mar, Passeig Marítim 37-49, Barcelona 08003, Spain

<sup>a</sup> Corresponding author: ignacio @imedeia.uib-csic.es ; Tel: +34 971611402

**Abstract** - The time-response, dynamics, classification power and relationship with survival of three muscle-based condition indices were analysed in pre-flexion sea bass (*Dicentrarchus labrax* L.) larvae in response to three feeding treatments: fed, non-fed and late-feeding. Larvae were reared at  $19 \pm 0.8^\circ\text{C}$  and analysed from the second day of feeding (6 days after hatching (DAH)) to just prior the flexion stage (21 DAH). The indices were analysed in trunk muscle at biochemical (RNA/DNA, R/D), histological (percentage of muscle fibre separation, MFS) and morphometric (size-standardised body depth at the anus level,  $D_{AZ}$ ) level. No index was correlated with muscle length in the fed treatment regardless the period analysed (before or after full external feeding). The R/D was the only index that could detect past feeding differences in larvae  $\leq 13$  DAH. For larvae  $> 13$  DAH, MFS, R/D and  $D_{AZ}$  in that order, yielded the best discrimination among treatments. For late-feeding larvae, latency was two days (R/D) and two-four days (MFS). Dynamics of recovery after food addition was also similar for R/D and MFS. Significant relationships between muscle growth and R/D or MFS were only found in larvae  $> 13$  DAH. Both R/D and MFS encompassed the mass mortality event observed in non-fed larvae at 17 DAH. The  $D_{AZ}$  largely failed to give information on the feeding status.

Key words: condition / *Dicentrarchus labrax* / larvae / muscle / growth / survival

## 1 Introduction

In the wild, the accumulated subtle action of growth-reducing factors (e.g. suboptimal feeding) can directly or indirectly explain most of the variation in larval mortality (Anderson 1988). Condition indices (CIs) are used to monitor physiological status or growth and operate at any organisation level of the individual. CIs differ in their sensitivity, latency, or dynamics (*sensu* Ferron and Leggett, 1994). One of the sources of variability of a given CI arises from tissular-specificity. The trunk (skeletal) muscle is a key tissue to study growth processes as it is catabolised during starvation and accounts for most on the mass increase in larvae of many species (e.g. Pedersen 1990). At a biochemical level, the RNA/DNA (R/D hereafter) measures the synthetic activity in the muscle of a growing larva, based on the more stable DNA content per cell with respect to RNA during metabolic processes (Buckley et al. 1999). At tissular level, suboptimal feeding decreases the thickness of the muscle fibres (e.g. Catalán and Olivar 2002) and muscle alteration is also reflected as a change in muscle shape (e.g. Koumoundouros et al. 2001). Size-independence is a must for CIs. This is usually accomplished by biochemical or histological indices, but not by morphometric indices. For these, the use of ratios, residuals or PCA (e.g. Suthers, 1992) has tried to remove the size effects, but have largely failed to do so due to the effects of allometry. This work compares three size-independent muscle-based CIs at morphometric, histological and biochemical levels, in regard to i) their ability to differentiate feeding conditions of pre-flexion sea bass larvae and ii) encompass growth and mortality in the laboratory. We chose the sea bass *Dicentrarchus labrax* L. to compare these CIs, as the ontogeny, rearing requirements and growth of this species are known (Barnabé et al. 1976; Marangos 1986), as well as the effect of temperature and to a lesser extent food on muscle growth dynamics (Johnson and Katavic 1986; Bergeron and Person-Le Ruyet 1997; Ayala et al. 2003; López-Albors et al. 2003; Abdel et al. 2004; Alami-Durante et al. 2006; Catalán et al. 2007; López-Albors et al. 2008 and references cited therein).

## 2 Materials and Methods

Sea bass larvae from a single female of Mediterranean origin were reared at  $19 \pm 0.8^\circ\text{C}$  since hatching in a small-scale recirculation system designed for experimental ecology. The rearing conditions, growth and survival were fully described in Olivar et al. (2000). Larvae were analysed from 6 to 21 days after hatching (DAH). The feeding treatments were: “fed” (*ad lib*), “non-fed” and “late-feeding” (starved individuals which were re-fed from 13 DAH (Table 1). Larvae were randomly sampled from 4l-rearing cylinders (described in Olivar et al. 2000), using 4 replicates (fed), 3 replicates (non-fed) and 1 replicate (late-feeding). Statistical analyses were performed using Minitab 15 (from Minitab Inc., U.S.A.). For parametric methods, homoscedasticity was always met.

### 2.1 Selection of size-independent condition indices

The CIs used embraced an expanded version (one more treatment) of previous biochemical and histological indices published by the authors (Catalán and Olivar 2002; Berdalet et al. 2005a), plus a new morphometric CI designed to remove the effects of size yet accounting for allometry. Larvae were sampled before being fed at 10 a.m. and stored at  $-80^\circ\text{C}$  (for R/D) or in 10% phosphate-buffered formalin (rest of the analyses). Before processing, notochord length ( $L_N$ ), body depth at the anus level ( $D_A$ ) and head

length ( $L_H$ ) (all in mm) were taken under a binocular microscope. Body measures were standardised to body muscle length ( $L_M$ ). The  $L_M$  was measured from the end of the chleithrum to the end of the notochord ( $L_N-L_H$ ). All  $L_M$  measures were standardised to the length in the preserving formalin solution, using a conversion based on fresh larvae measured before and after placing them in that solution for 4 days (unpubl. data). The R/D was used as biochemical CI. Analyses were performed “mainly” on muscle tissue of individual defrozen larvae (heads and guts were discarded prior to processing) and analysed following Berdalet et al. (2005b). The histological CI was published by Catalán and Olivar (2002) and is based on the semi-automatic detection of the percentage muscle fibre separation (MFS), applied to 3  $\mu$ m saggital sections of Historesin (Leica)-embedded trunk muscle containing 4-6 myotomes and died with Lee’s methylene-blue basic fuchin. As morphometric CI, we selected the body depth at the anus level ( $D_A$ ). Size effects are not important if age is known (Fig. 1a) but it is not the case if age is unknown (Fig. 1b) as it happens in field samples. To account for allometric effects, the morphological factor of each individual ( $D_A$ ) was scaled to a common body size of the larval pool to be analysed (Lleonart et al. 2000). We divided the larvae into two groups to account for the two-phase growth observed in Fig. 2b. We selected the day at which no remnants of maternal reserved were observed (13 DAH) as a cut point. Allometry between  $L_M$  and  $D_A$  for each treatment and period was explored by fitting the equation

$$D_A = a \cdot L_M^b$$

where  $b$  is the allometric factor, and  $a$  is the expected value of  $D_A$  at  $L_M = 1$ . The values  $a$ ,  $b$  and the standard deviations (in ln-transformed units) were first calculated, and the existence of allometry tested through a T-test. If significant slopes did not differ from 1, the ratio  $D_A/L_M$  was used, as ratios are uncorrelated with size in isometric growth. Otherwise, the  $D_A$  of each individual was normalised ( $D_{AZ}$ ) following Lleonart et al. (2000), according to

$$D_{AZ} = D_A \cdot [L_{M0} \cdot L_M^{-1}]^b$$

where  $L_{M0}$  is the selected reference  $L_M$  and  $b$  is the allometric parameter which relates  $D_A$  to  $L_M$ . The slopes of the regressions were compared through GLM on ln-linearised variables ( $L_M$  used as a covariate).

## 2.2 Comparison of indices

The performance of each CI was explored with respect to age for each period (13 DAH cut point).

The *latency* (time to a detectable change in condition after a change in food supply) and *dynamics* (behaviour of this reaction) (Ferron and Leggett 1994) of each CI were analysed. Daily among-treatment differences were analysed through ANOVA followed by Tukey’s HSD in the case of R/D and  $D_{AZ}$ , and through Kruskal-Wallis or Mann-Whitney tests for MFS due to the non-normality of the residuals. Their dynamics was modelled using standard regression analysis.

The “power” of each CI to assign a particular larva to its feeding treatment was assessed through linear Discriminant Analysis (DA). The DA was applied separately to the two developmental periods. As the sample size and sampling frequency differed for each

index, two DA were applied: i) a conservative DA using coincident sampling days and sample size (scaling down the data by data point elimination to the number of data points of the CI with the lowest number of observations); ii) a second DA using all available data. The DA was performed setting *a priori* classification probabilities proportional to group sizes and with no cross-validation.

As no estimates of muscle dry weight was available, a volumetric proxy was used to estimate a daily muscle potential growth ( $G_{MP}$ ). For each day, it was measured as the expected absolute ( $G_{MP}$ ,  $\text{mm}^3 \text{ day}^{-1}$ ) or relative (%  $G_{MP}$ ) change in average muscle volume in the following day. The muscle volume was assimilated to a cylinder according to

$$V_M = \pi \cdot (D_A^2)^{\frac{1}{2}} \cdot L_M$$

where  $V_M$  is muscle volume ( $\text{mm}^3$ ).  $G_{MP}$  was calculated as

$$G_{MP} = ((V_M(T_2) - V_M(T_1)) \cdot (T_2 - T_1)^{-1})$$

where  $T_1$  and  $T_2$  are time 1 and time 2 in days. The  $G_{MP}$  was used to estimate  $V_M$  at the following day (where gaps > 1 day appeared), and the %  $G_{MP}$  was estimated according to

$$\% G_{MP} = [((V_M(T_2) - V_M(T_1)) \cdot (V_M(T_1))^{-1}) \cdot (T_2 - T_1)^{-1}] \cdot 100$$

The average  $V_M$ ,  $G_{MP}$  and %  $G_{MP}$  were calculated for each day in the subsets of larvae in Table 1.

The percentage daily mortality ( $M$ , %  $\text{day}^{-1}$ ) was calculated as the average percent larvae dying with respect to the previous day. The correlation (Spearman,  $r_s$ ) between  $G_{MP}$ , %  $G_{MP}$ ,  $M$  and the CIs was explored only in non-fed larvae (the only treatment showing a mass mortality event, Olivar et al. 2000). Data of larvae < 9 DAH were discarded because mortality was high and comparable across treatments before that day (see Olivar et al. 2000).

### 3 Results and Discussion

White fibres make the bulk of the preflexion muscle mass (Alami-Durante et al. 2006), and they are independent of small temperature differences during pre-flexion stages (Veggetti et al. 1990; Alami-Durante et al. 2006). Therefore, the skeletal muscle is an ideal tissue to study the effects of suboptimal feeding. Growth and survival was similar within replicated treatments (Olivar et al. 2000) and almost no larval mortality occurred in the fed larvae after 9 DAH. The major developmental events appear in Fig. 2.

#### 3.1 Size-independence and choice of indices

The removal of size effects was successful. For any given feeding treatment, there were no significant differences in the  $L_M$  (ln-transformed) vs age relationships among groups of larvae used for the three CIs (GLM, age taken as covariate). For both R/D and MFS, no significant correlations with  $L_M$  were observed in fed or non-fed larvae in any period. However, a positive (R/D:  $r_s = 0.79$ ,  $n = 14$ ,  $p < 0.0001$ ) and negative (MFS:  $r_s = -0.70$ ,  $n = 24$ ,  $p < 0.001$ ) correlation was found in the late-feeding larvae. This is considered

unavoidable in cases of sharp growth increase, and suggests that, in field studies, CIs should only be used in case of smooth growth functions. The DNA/RNA slope ratio of the standard curve was 3.965.

For the morphometric index, relationships between  $D_A$  and  $L_M$  were significant for the period  $\leq 13$  DAH, (fed:  $\ln D_A = 1.015 \cdot \ln L_M - 2.837$ ,  $F_{1,41}$ ,  $p < 0.005$ ; non-fed:  $\ln D_A = 0.698 \cdot \ln L_M - 2.413$ ,  $F_{1,24}$ ,  $p < 0.05$ ). The lack of among-treatment significance in slopes or means (GLM) enabled pooling the groups for that first period. For larvae  $> 13$  DAH, only the  $D_A$  of non-fed larvae was uncorrelated with  $L_M$ . The remaining groups were significantly related (fed:  $\ln D_A = 1.827 \cdot \ln L_M - 4.019$ ,  $F_{1,66}$ ,  $r^2 = 0.923$ ,  $p < 0.05$ ; non-fed:  $\ln D_A = 1.832 \cdot \ln L_M - 4.00$ ,  $F_{1,23}$ ,  $p < 0.05$ ). As no significant differences in slopes or means between fed and late-feeding larvae were found (GLM) and non-fed larvae had a very short size range (Fig. 1b), larvae were pooled for this period too (Fig. 1c). Slopes of the pooled groups differed between the two periods (GLM; slopes:  $F_{1,184}$ ,  $p < 0.05$ ). Growth of  $D_A$  was isometric ( $H_0: \beta = 1$ ,  $p = 0.56$ ) in larvae  $\leq 13$  DAH, so ratios were derived to obtain  $D_{AZ}$ . Larvae  $> 13$  DAH showed a strong allometric development (Fig. 1c), hence the method by Lleonart et al. (2000) was applied to obtain  $D_{AZ}$ , selecting a  $L_{M0}$  of 5 mm  $L_M$ , which was the mean of the  $L_M$  distribution for all treatments. The resulting  $D_{AZ}$  values showed no correlation with  $L_M$  in the control group for any of the periods.

## 3.2 Comparison of indices properties

### 3.2.1 Latency and dynamics

In Fed larvae, all CIs but R/D were stable through age and developmental period (Fig. 2). Non-fed larvae tended to show lower mean R/D values with respect to fed larvae (Fig. 2a). The MFS of non-fed larvae remained low until 10 DAH, increasing rapidly afterwards (Fig. 2b), which implies a similar latency to that of R/D (7-10 days). The concurrent decrease in mean R/D values in fed (-30%) and non-fed (-54%) larvae until 10 DAH was due to a higher increase rate in DNA content prior to that day (93% in fed, -1% in non-fed), which has been observed elsewhere (Bergeron and Person-Le Ruyet 1997), coupled to comparatively lower RNA figures (34 % in fed, -53% in non-fed). This might be related to high hyperplastic activity (Veggetti et al. 1990; Alami-Durante et al. 2006) occurring at the expense of maternal reserves. Data on  $D_{AZ}$  was difficult to interpret in terms of latency for the non-fed larvae (Fig. 2c). For late-feeding larvae, latency for mean R/D was 2 days, whereas for median MFS was 2-4 days (Fig. 2a,b). Latency values for mean  $D_{AZ}$  could not be computed (Fig. 2c).

The R/D dynamics of non-fed larvae showed a constant decrease from 6 DAH, except for an increase on days 13 and 14 (Fig. 2a). In these days, a high DNA content was detected in some larvae (not shown) but the cause for this is unknown. The recovery dynamics for R/D was of 1.8 R/D units day<sup>-1</sup> (late-feeding) ( $y = 1.81x - 23.181$ ,  $r^2 = 0.80$ ,  $p < 0.0001$ ) between 14 and 16 DAH, day after which values were similar to those of fed larvae. The values of R/D latency and dynamics are similar to those observed by other authors (Buckley et al. 1999). For MFS, dynamics of late-feeding larvae showed a linear decrease of 1% day<sup>-1</sup> between 14 and 19 DAH ( $y = 19.65 - 0.95x$ ,  $r^2 = 0.51$ ,  $p < 0.01$ ). Dynamics of  $D_{AZ}$  of late-feeding larvae showed a slight increasing trend between 14 and 21 DAH ( $y = 0.007x + 0.221$ ,  $r^2 = 0.21$ ,  $p < 0.05$ ), with mean values often above



those of fed larvae (Fig. 2c), although daily differences between treatments could not be established.

### 3.2.2 Classification performance

The R/D was the only CI able to detect feeding differences in larvae  $\leq 13$  DAH, correctly classifying up to 69% of fed and 77% of non-fed larvae (Table 2). In larvae  $> 13$  DAH, MFS and R/D (in this order according to their Wilks' Lambda values) yielded the best discrimination. High discrimination values (over 78%) were achieved by R/D and MFS for fed and non-fed larvae (Table 2), whereas for late-feeding larvae these values were low (maximum of 37% by the MFS). Late-feeding larvae were confounded with fed larvae by R/D, and with any other group by MFS. In general, the  $D_{AZ}$  was not able to significantly ascribe the larvae to their feeding group, although a slight (high Wilks' value) significant discrimination for fed larvae was observed only when all larvae  $> 13$  DAH were used.

### 3.2.3 Relationship with potential muscle somatic growth and mortality

In larvae  $\leq 13$  DAH, no significant correlation was found between any CI and  $G_{MP}$  or %  $G_{MP}$ . In larvae  $> 13$  DAH, high R/D values were related to high  $G_{MP}$  (Table 3). The MFS only correlated to  $G_{MP}$  when all larvae  $> 13$  DAH were used. Correlations with %  $G_{MP}$  were not significant for any index. The  $D_{AZ}$  showed no clear relationship with potential growth. Mortality rates were below 5% before 17 DAH. At 17 DAH,  $M$  was 9.3%, marking the initiation of the starvation-induced mass larval mortality (Fig. 2). Correlations of CIs of non-fed larvae with  $M$  were significant for R/D and MFS (Table 3) but could not be computed for  $D_{AZ}$  due to the size standardisation method. However, from Fig 2c it can be inferred that there was not a relationship between  $D_{AZ}$  and survival in the non-fed larvae.

In general, the relationships between good values of R/D and MFS and high growth rates supports the suitability of these indices for field studies in the frame of the growth-mortality hypothesis (e.g. Anderson 1988). Further, the comparable relationship of R/D and MFS with  $M$  suggests that these indices are not only related to growth but to starvation-induced physiological thresholds directly causing mortality. This, however, was not the case for  $D_{AZ}$ , which did not encompass the mass mortality event (Fig. 1a). Further work on the effect of suboptimal feeding on muscle development at different time scales in a frame of physiological ecology is guaranteed.

**Acknowledgements.** The authors thank C. Roldán for her help in the R/D analyses. This work was funded by the following research programmes: CYTMAR-MAR97 09-02 and Centre de Referència de Recerca i Desenvolupament en Aquicultura (CRA-CIRIT) of the Generalitat de Catalunya. All the analyses performed comply with the Spanish laws at the time of the experiment.

### References

Abdel I., Abellán E., López-Albors O., Valdés P., Nortes M.J., García-Alcázar A., 2004, Abnormalities in the juvenile stage of sea bass (*Dicentrarchus labrax* L.) reared at different temperatures: types, prevalence and effect on growth. *Aquac. Int.* 12, 523-538.

- Alami-Durante H., Rouel M., Kentouri M., 2006, New insights into temperature-induced white muscle growth plasticity during *Dicentrarchus labrax* early life: a developmental and allometric study. Mar. Biol. 149, 1551–1565.
- Anderson J.T., 1988, A review of size dependent survival during pre-recruit stages of fishes in relation to recruitment. J. Northwest Atl. Fish. Sci. 8, 55-66.
- Ayala M.D., Albors O.L., Alcazar A.G., Abellan E., Latorre R., Vazquez J.M., Zarzosa G.R., Martinez F., Gil F., 2003, Effect of two thermal regimes on the muscle growth dynamics of sea bass larvae, *Dicentrarchus labrax* L. Anat. Hist. Embr. J. Vet. Med. Ser. C 5, 271-275.
- Barnabé G., Boulineau-Coatanea F., Rene F., Martin V., 1976, Chronologie de la morphogenese chez le loup ou bar *Dicentrarchus labrax* (L.) (Pisces, Serranidae) obtenu par reproduction artificielle. Aquaculture 8, 351-363.
- Berdalet E., Roldan C., Olivar M.P., 2005a, Quantifying RNA and DNA in planktonic organisms with SYBR Green II and nucleases. Part B. Quantification in natural samples. Sci. Mar. 69, 17-30.
- Berdalet E., Roldan C., Olivar M.P., Lysnes K., 2005b, Quantifying RNA and DNA in planktonic organisms with SYBR Green II and nucleases. Part A. Optimisation of the assay. Sci. Mar. 69, 1-16.
- Bergeron J.P., Person-Le Ruyet J., 1997, Teneur en ADN de la larve de *Dicentrarchus labrax*: évolution ontogénétique et effet de la privation de nourriture. Aquat. Living Resour. 10, 247-250.
- Buckley L., Caldarone E., Ong T.L., 1999, RNA-DNA ratio and other nucleic acid-based indicators for growth and condition of marine fishes. Hydrobiologia 401, 265-277.
- Catalán I.A., Olivar M.P., 2002, Quantification of muscle condition using digital image analysis in *Dicentrarchus labrax* larvae, and relationship with survival. J. Mar. Biol. Ass. U.K. 82, 1-6.
- Catalán I.A., Berdalet E., Olivar M.P., Roldán C., 2007, Response of muscle-based biochemical condition indices to short-term variations in food availability in post-flexion reared sea bass (*Dicentrarchus labrax* L.) larvae. J. Fish Biol. 70, 391-405.
- Clemmesen C.M., 1987, Laboratory studies on RNA/DNA ratios of starved and fed herring (*Clupea harengus*) and turbot (*Scophthalmus maximus*) larvae. J. Cons. – Cons. Int. Exp. Mer 43, 122-128.
- Ferron A., Leggett W.C., 1994, An appraisal of condition measures for marine fish larvae. Adv. Mar. Biol. 30, 217-303.

- Johnson D.W., Katavic I., 1986, Survival and Growth of sea bass (*Dicentrarchus labrax*) larvae as influenced by temperature, salinity, and delayed initial feeding. *Aquaculture* 52, 11-19.
- Koumoundouros G., Divanach P., Anezaki L., Kentouri M., 2001, Temperature-induced ontogenetic plasticity in sea bass (*Dicentrarchus labrax*). *Mar. Biol.* 139, 817-830.
- Lleonart J., Salat J., Torres G.J., 2000, Removing allometric effects of body size in morphological analysis. *J. Theor. Biol.* 205, 85-93.
- López-Albors O., Ayala M.D., Gil F., García-Alcazar A., Abellan E., Latorre R., Ramirez-Zarzosa G., Vazquez J.M., 2003, Early temperature effects on muscle growth dynamics and histochemical profile of muscle fibres of sea bass *Dicentrarchus labrax* L., during larval and juvenile stage. *Aquaculture* 220, 385–406.
- López-Albors O., Abdel I., Periago M.J., Ayala M.D., Alcazar A.G., Gracia C.M., Nathanailides C., Vazquez J.M., 2008, Temperature influence on the white muscle growth dynamics of the sea bass *Dicentrarchus labrax*, L. Flesh quality implications at commercial size. *Aquaculture* 277, 39-51.
- Marangos Ch., Yagi H., Ceccaldi H.J., 1986, Rôle de la température et de la salinité sur le taux de survie et la morphogenèse au cours du développement embryonnaire chez les œufs du loup de mer, *Dicentrarchus labrax* (Linnaeus, 1758) (Pisces, Teleostei, Serranidae). *Aquaculture* 54, 287–300.
- Olivar MP., Ambrosio P.P., Catalán I.A., 2000, A closed water recirculation system for ecological studies in marine fish larvae: growth and survival of sea bass larvae fed with live prey. *Aquat. Living Resour.* 13, 29-35.
- Pedersen B.H., Ugelstad I., Hjelmeland K., 1990, Effects of a transitory, low food supply in the early life of larval herring (*Clupea harengus*) on mortality, growth and digestive capacity. *Mar. Biol.* 107, 61-66.
- Scapolo P.A., Veggetti A., Mascarello F., Romanello M.G., 1988, Developmental transitions of myosin isoforms and organisation of the lateral muscle in the teleost *Dicentrarchus labrax* (L.). *Anat. Embryol.* 178, 287–295.
- Suthers I.M., 1992, The use of condition indices in larval fish. Canberra: Australian Government Publishing Service.
- Veggetti A., Mascarello F., Scapolo P.A., Rowleron A., 1990, Hyperplastic and hypertrophic growth of lateral muscle in *Dicentrarchus labrax* (L.). *Anat. Embryol.* 182, 1-10.



Table 1. Number of larvae used for each index/day/feeding treatment. Late-feeding started at 13 days after hatching (DAH). The feeding scheme is in Olivar et al. (2000)

| Index           | Treatment    | Time (DAH) |   |    |    |    |    |    |    |    |    |    |    |    |    | Total <i>n</i> |
|-----------------|--------------|------------|---|----|----|----|----|----|----|----|----|----|----|----|----|----------------|
|                 |              | 6          | 8 | 10 | 11 | 12 | 13 | 14 | 15 | 16 | 17 | 18 | 19 | 20 | 21 |                |
| R/D             | Fed          | 5          | 6 | 5  | 4  | 4  | 5  | 4  | 6  | 3  | 8  | 6  |    |    |    | 56             |
|                 | Non-fed      | 6          | 5 | 6  | 4  | 2  | 3  | 4  | 2  | 1  | 3  | 6  |    |    |    | 42             |
|                 | Late-feeding | -          | - | -  | -  | -  | -  | 2  | 3  | 1  | 4  | 4  |    |    |    | 14             |
| MFS             | Fed          | 5          |   | 2  |    |    |    | 5  |    |    | 5  |    | 5  |    | 5  | 27             |
|                 | Non-fed      | 6          |   | 5  |    |    |    | 5  |    |    | 5  |    | 5  |    | 2  | 29             |
|                 | Late-feeding | -          | - | -  | -  | -  | -  | 4  |    |    | 5  |    | 3  |    | 4  | 16             |
| D <sub>AZ</sub> | Fed          | 12         | 6 | 7  | 8  | 6  | 4  | 7  | 8  | 9  | 10 | 9  | 8  | 9  | 8  | 111            |
|                 | Non-fed      | 6          | 4 | 4  | 4  | 4  | 4  | 3  | 3  | 4  | 3  | 5  | 3  | 2  | 1  | 50             |
|                 | Late-feeding | -          | - | -  | -  | -  | -  | 4  | 3  | 2  | 4  | 4  | 3  | 3  | 4  | 27             |

Table 2. Results of the linear discriminant analysis (DA) for each condition index before (larvae  $\leq 13$  days after hatching, DAH) and after (larvae  $> 13$  DAH) the total exhaustion of maternal reserves. DA was applied using 1) common sample size ( $n$ ) and sampling days, and 2) using all the larvae. F = fed; NF = non-fed; LF = late-feeding; % corr = percent correct classification; NS = not significant;  $W$  = Wilks' lambda. Significance was set after an  $F$  test, for which the degrees of freedom and the significance level are indicated.

|                   | Condition index | Treatment | Larvae $\leq 13$ DAH       |    |         |                                          | Overall significance | Larvae $> 13$ DAH          |    |    |                                          | Overall significance |               |
|-------------------|-----------------|-----------|----------------------------|----|---------|------------------------------------------|----------------------|----------------------------|----|----|------------------------------------------|----------------------|---------------|
|                   |                 |           | Classification into groups |    |         | Class. Functions (coefficient; constant) |                      | Classification into groups |    |    | Class. Functions (coefficient; constant) |                      |               |
|                   |                 |           | F                          | NF | % corr. |                                          |                      | F                          | NF | LF |                                          |                      | % corr.       |
| Same $n$ and days | R/D             | F         | 6                          | 4  | 60.0    | 1.518; -5.272                            | $W = 0.74$           | 12                         | 2  | 0  | 85.7                                     | 2.322; -7.860        | $W = 0.594$   |
|                   |                 | NF        | 2                          | 5  | 71.4    | 0.963; -2.796                            | $F_{1,15}$           | 3                          | 6  | 0  | 66.7                                     | 1.189; -3.090        | $F_{2,28}$    |
|                   |                 | DF        | -                          | -  | -       | -                                        | $p < 0.05$           | 6                          | 2  | 0  | 0.0                                      | 2.099; -7.127        | $p < 0.001$   |
|                   | MFS             | F         | -                          | -  | -       | -                                        | $W = 0.987$          | 14                         | 0  | 0  | 100.0                                    | 0.177; -0.867        | $W = 0.31$    |
|                   |                 | NF        | -                          | -  | -       | -                                        | $F_{1,15}$           | 0                          | 7  | 2  | 77.0                                     | 1.761; -8.297        | $F_{2,28}$    |
|                   |                 | DF        | -                          | -  | -       | -                                        | $p = 0.66$ NS        | 3                          | 2  | 3  | 37.5                                     | 0.917; -3.266        | $p < 0.0001$  |
|                   | $D_{AZ}$        | F         | -                          | -  | -       | -                                        | $W = 0.99$           | -                          | -  | -  | -                                        | -                    | $W = 0.924$   |
|                   |                 | NF        | -                          | -  | -       | -                                        | $F_{1,15}$           | -                          | -  | -  | -                                        | -                    | $F_{2,28}$    |
|                   |                 | DF        | -                          | -  | -       | -                                        | $p = 0.81$ NS        | -                          | -  | -  | -                                        | -                    | $p = 0.33$ NS |
| All larvae        | R/D             | F         | 20                         | 9  | 69.0    | 1.569; -5.444                            | $W = 0.81$           | 23                         | 0  | 4  | 85.2                                     | 2.627; -9.458        | $W = 0.455$   |
|                   |                 | NF        | 6                          | 20 | 76.9    | 1.086; -3.049                            | $F_{1,53}$           | 1                          | 2  | 13 | 81.3                                     | 1.030; -2.609        | $F_{2,54}$    |
|                   |                 | DF        | -                          | -  | -       | -                                        | $p < 0.001$          | 8                          | 5  | 1  | 7.0                                      | 2.033; -6.618        | $p < 0.0001$  |
|                   | MFS             | F         | -                          | -  | -       | -                                        | $W = 1.00$           | 20                         | 0  | 0  | 100.0                                    | 0.165; -1.066        | $W = 0.328$   |
|                   |                 | NF        | -                          | -  | -       | -                                        | $F_{1,16}$           | 0                          | 14 | 4  | 77.8                                     | 1.597; -7.889        | $F_{2,51}$    |
|                   |                 | DF        | -                          | -  | -       | -                                        | $p = 0.99$ NS        | 8                          | 2  | 6  | 37.5                                     | 0.614; -2.220        | $p < 0.0001$  |
|                   | $D_{AZ}$        | F         | -                          | -  | -       | -                                        | $W = 0.991$          | 68                         | 0  | 0  | 100.0                                    | 325.234; -55.927     | $W = 0.941$   |
|                   |                 | NF        | -                          | -  | -       | -                                        | $F_{1,67}$           | 23                         | 1  | 0  | 4.2                                      | 310.264; -51.947     | $F_{2,115}$   |
|                   |                 | DF        | -                          | -  | -       | -                                        | $p = 0.437$ NS       | 26                         | 0  | 0  | 0.0                                      | 334.140; -60.001     | $p < 0.05$    |

Table 3. Spearman rank-correlation ( $r_s$ ) results between each condition index and daily potential muscle growth ( $G_{MP}$ ,  $\text{mm}^3 \text{ day}^{-1}$ ), daily percentage potential muscle growth ( $\% G_{MP}$ ) and daily mortality ( $M$ ,  $\% \text{ day}^{-1}$ ), using either a common sample size  $n$  and sampling dates or all larvae for the obtention of the mean values of the condition indices. For  $G_{MP}$  and  $\% G_{MP}$ , only larvae > 13 days after hatching (DAH) are used. For correlations with  $M$ , only non-fed larvae are used. N. points refers to the total data points used for correlation. Av. larv/point is the average number of larvae used for each data point.

|                         | Larval Subset | Common $n$ and days |           |                |       | All larvae |           |                |        |
|-------------------------|---------------|---------------------|-----------|----------------|-------|------------|-----------|----------------|--------|
|                         |               | $r_s$               | N. points | Av. larv/point | $p$   | $r_s$      | N. points | Av. larv/point | $p$    |
| R/D vs $G_{MP}$         | > 13 DAH      | 0.88                | 6         | 3.3            | <0.05 | 0.69       | 12        | 3.4            | <0.05  |
| MFS vs $G_{MP}$         | > 13 DAH      | -0.54               | 6         | 3.3            | 0.27  | -0.91      | 9         | 4.8            | <0.001 |
| $D_{AZ}$ vs $G_{MP}$    | > 13 DAH      | 0.14                | 6         | 3.3            | 0.74  | 0.08       | 21        | 5              | 0.737  |
| R/D vs $\% G_{MP}$      | > 13 DAH      | 0.26                | 6         | 3.3            | 0.62  | 0.55       | 12        | 3.4            | 0.06   |
| MFS vs $\% G_{MP}$      | > 13 DAH      | -0.20               | 6         | 3.3            | 0.70  | -0.53      | 9         | 4.8            | 0.139  |
| $D_{AZ}$ vs $\% G_{MP}$ | > 13 DAH      | 0.03                | 6         | 3.3            | 0.95  | 0.26       | 21        | 5              | 0.263  |
| R/D vs $M$              | Non-fed       | -0.60               | 4         | 3.7            | <0.05 | -0.47      | 9         | 3.6            | <0.01  |
| MFS vs $M$              | Non-fed       | 0.58                | 4         | 3.7            | <0.05 | 0.41       | 5         | 5.4            | 0.051  |
| $D_{AZ}$ vs $M$         | Non-fed       | -                   | -         | -              | -     | -          | -         | -              | -      |

## Figure captions

Fig. 1. Evolution of body depth at anus level ( $D_A$ ) among feeding treatments vs age (a) and body muscle length ( $L_M$ ) (b). In (c), fitted regressions to both developmental groups are shown. For larvae  $\leq 13$  DAH:  $\text{Ln } D_A = 0.920 \cdot \text{Ln } L_M - 2.711$ ,  $F_{1,67}$ ,  $r^2 = 0.33$ ,  $p < 0.05$ . For larvae  $> 13$  DAH:  $\text{Ln } D_A = 1.839 \cdot \text{Ln } L_M - 4.045$ ,  $F_{1,116}$ ,  $r^2 = 0.93$ ,  $p < 0.001$ . Filled circles are fed treatment, open circles are non-fed treatment, triangles are late-feeding treatment. In (a), values are means  $\pm 1$  SE and, for a given day, significant differences among treatments are indicated by different letters ( $p < 0.05$ ), using either t-tests (2 groups) or ANOVA (3 groups) with HSD for unequal number of observations.

Fig. 2. Relationship between percentage survival of non-fed larvae and the biochemical (a), histological (b) and morphometrical (c) condition indices for that treatment. Symbols, color codes and statistical tests as for Fig. 1, except for MFS, for which values are medians, errors are interquartilic ranges, and statistics are non-parametrical (Mann-Whitney for 2 groups and Kruskal-Wallis for 3 groups). The feeding scheme is indicated: R= rotifers,  $A_0$  = *Artemia* nauplii,  $A_1$ = 1 day-old *Artemia* metanauplii.

FIGURE 1

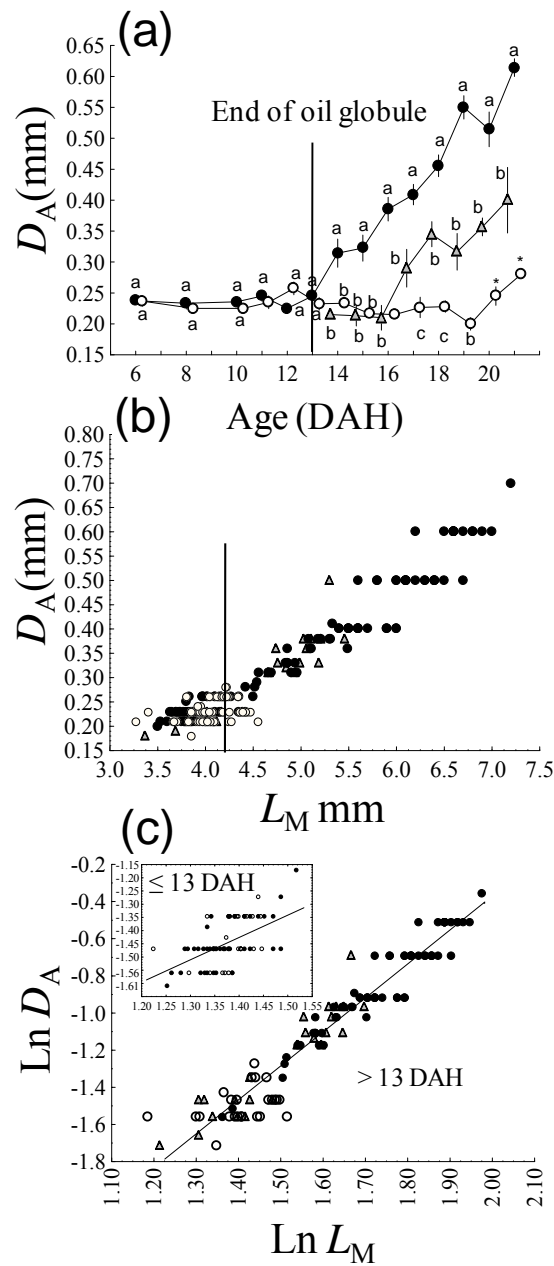



542

FIGURE 2

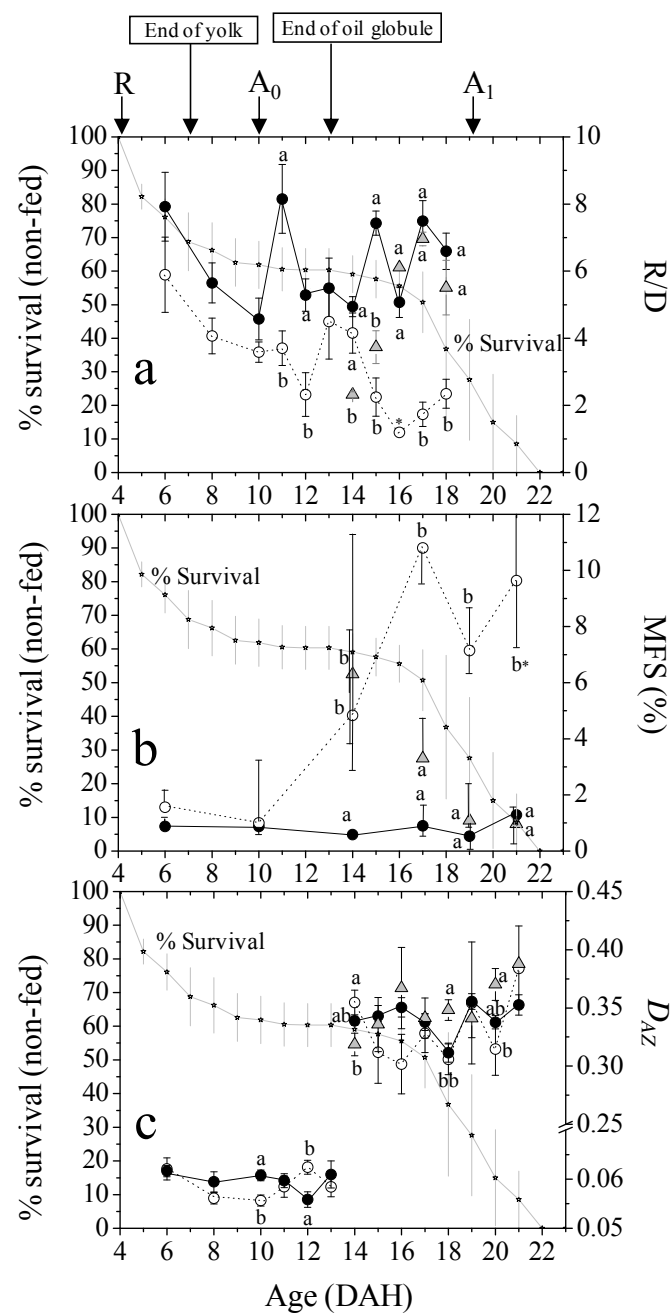

Source: http://www.biorxiv.org/content/10.1101/023630v1.full.pdf
